# Supplementary material
Source: Springer Nature journal article supplement (https://www.springermedizin.de/resource/supplementary/12916_2013_981_MOESM12_ESM.pdf/9598756)

**Supplementary Figure 1:** Results from KEGG pathway analysis using genes that exhibit differential DNA methylation ( $P < 0.05$ ) after palmitate treatment in human pancreatic islets. Includes only pathways which also displayed enrichment for genes with differential expression after palmitate treatment in human pancreatic islets.

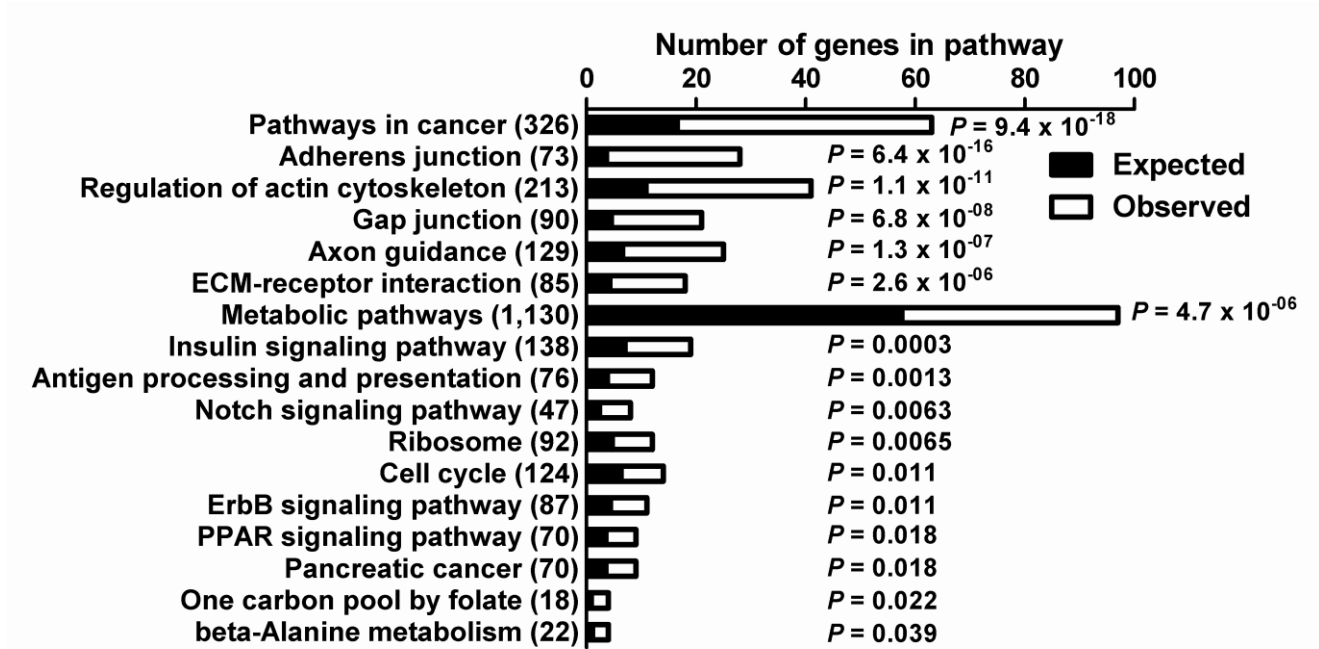

Supplement: MOESM12 [file 9598756]
